# Supplementary material
Source: PubMed Central journal article supplement (PMC4214262)
Supplement: ijmeg0005-0145-f1.pdf [file ijmeg0005-0145-f1.pdf]

## Anti-Mullerian hormone genes and breast cancer

**Supplementary Table 1.** 62 SNPs in *AMH*, *ACVR1*, and *AMHR2* genes

| Gene                                  | rs#        | Caucasians         |                      |           | African Americans  |                      |           |
|---------------------------------------|------------|--------------------|----------------------|-----------|--------------------|----------------------|-----------|
|                                       |            | Major/minor allele | MAF (%) <sup>a</sup> | P for HWE | Major/minor allele | MAF (%) <sup>a</sup> | P for HWE |
| Anti-mullerian hormone ( <i>AMH</i> ) | rs733846   | T/G                | 16                   | 0.340     | G/T                | 43                   | 0.016     |
|                                       | rs2074860  | A/G                | 18                   | 0.379     | G/A                | 42                   | 0.224     |
|                                       | rs3746158  | A/G                | 23                   | 0.528     | A/G                | 42                   | 0.203     |
|                                       | rs3761021  | T/C                | 2                    | 0.654     | T/C                | 15                   | 0.537     |
|                                       | rs4806834  | C/T                | 3                    | 0.456     | C/T                | 29                   | 0.281     |
|                                       | rs6510652  | G/T                | 9                    | 0.098     | G/T                | 26                   | 0.976     |
|                                       | rs6510653  | A/G                | 10                   | 0.427     | G/A                | 45                   | 0.068     |
|                                       | rs7249235  | C/A                | 9                    | 0.052     | C/A                | 29                   | 0.170     |
|                                       | rs7250822  | G/C                | 16                   | 0.228     | G/C                | 18                   | 0.366     |
|                                       | rs7253181  | T/G                | 22                   | 0.398     | G/T                | 48                   | 0.859     |
|                                       | rs8112524  | A/G                | 38                   | 0.229     | G/A                | 37                   | 0.038     |
|                                       | rs10407022 | T/G                | 13                   | 0.012     | T/G                | 39                   | 0.723     |
|                                       | rs10415913 | G/A                | 9                    | 0.816     | A/G                | 49                   | 0.073     |
| AMH type 1 receptor ( <i>ACVR1</i> )  | rs12936    | G/T                | 0                    | 0.961     | G/T                | 5                    | 0.605     |
|                                       | rs1146031  | A/G                | 0                    | 0.923     | A/G                | 26                   | 0.691     |
|                                       | rs1146033  | A/G                | 1                    | 0.904     | A/G                | 26                   | 0.024     |
|                                       | rs1146037  | T/C                | 22                   | 0.569     | T/C                | 19                   | 0.042     |
|                                       | rs1220110  | T/A                | 27                   | 0.739     | A/T                | 36                   | 0.090     |
|                                       | rs1220133  | G/A                | 28                   | 0.477     | A/G                | 33                   | 0.583     |
|                                       | rs1220134  | T/A                | 28                   | 0.761     | A/T                | 35                   | 0.234     |
|                                       | rs1220135  | T/C                | 0                    | 0.000     | T/C                | 8                    | 0.778     |
|                                       | rs2883605  | G/T                | 10                   | 0.796     | G/T                | 1                    | 0.870     |
|                                       | rs3738927  | T/C                | 0                    | 0.981     | T/C                | 5                    | 0.581     |
|                                       | rs4233672  | G/A                | 19                   | 0.023     | A/G                | 32                   | 0.363     |
|                                       | rs4380178  | G/A                | 16                   | 0.124     | G/A                | 20                   | 0.369     |
|                                       | rs4664898  | A/G                | 19                   | 0.661     | A/G                | 26                   | 0.522     |
|                                       | rs4664901  | T/C                | 23                   | 0.140     | C/T                | 23                   | 0.560     |
|                                       | rs7561419  | C/T                | 0                    | 0.962     | C/T                | 23                   | 0.415     |
|                                       | rs7563276  | G/A                | 6                    | 0.886     | G/A                | 9                    | 0.932     |
|                                       | rs7565550  | C/A                | 20                   | 0.329     | C/A                | 29                   | 0.688     |
|                                       | rs7603425  | T/C                | 0                    | 0.981     | T/C                | 9                    | 0.151     |
|                                       | rs9288697  | G/T                | 5                    | 0.924     | G/T                | 29                   | 0.312     |
|                                       | rs10168000 | C/T                | 18                   | 0.137     | T/C                | 23                   | 0.068     |
|                                       | rs10497189 | T/C                | 12                   | 0.542     | T/C                | 1                    | 0.842     |
|                                       | rs10497190 | C/T                | 19                   | 0.215     | C/T                | 27                   | 0.776     |
|                                       | rs10497191 | C/T                | 13                   | 0.312     | T/C                | 21                   | 0.006     |
|                                       | rs10497192 | T/C                | 27                   | 0.494     | C/T                | 16                   | 0.002     |
|                                       | rs10497193 | A/G                | 18                   | 0.728     | A/G                | 42                   | 0.413     |
|                                       | rs10933441 | C/T                | 7                    | 0.913     | C/T                | 5                    | 0.000     |
|                                       | rs10933443 | T/C                | 25                   | 0.885     | C/T                | 38                   | 0.581     |
|                                       | rs12694937 | T/C                | 2                    | 0.713     | T/C                | 16                   | 0.812     |
|                                       | rs12987698 | T/G                | 17                   | 0.071     | G/T                | 30                   | 0.020     |
|                                       | rs13021202 | C/T                | 19                   | 0.060     | C/T                | 27                   | 0.474     |
|                                       | rs13395576 | T/C                | 0                    | 0.000     | T/C                | 6                    | 0.884     |
|                                       | rs13398650 | G/A                | 8                    | 0.340     | A/G                | 44                   | 0.026     |
|                                       | rs13426299 | C/G                | 0                    | 0.981     | C/G                | 20                   | 0.435     |
|                                       | rs16842009 | C/T                | 0                    | 0.000     | C/T                | 5                    | 0.703     |
|                                       | rs16842018 | G/T                | 1                    | 0.902     | G/T                | 32                   | 0.106     |
| rs16842023                            | C/T        | 1                  | 0.904                | C/T       | 15                 | 0.710                |           |
| rs16842091                            | C/T        | 0                  | 0.962                | C/T       | 5                  | 0.407                |           |
| rs16842126                            | A/T        | 1                  | 0.828                | A/T       | 11                 | 0.445                |           |
| rs16842128                            | G/T        | 0                  | 0.981                | G/T       | 6                  | 0.888                |           |
| rs16842130                            | C/T        | 0                  | 0.961                | C/T       | 12                 | 0.033                |           |

## Anti-Mullerian hormone genes and breast cancer

|                             |            |     |    |       |     |    |       |
|-----------------------------|------------|-----|----|-------|-----|----|-------|
|                             | rs16842143 | G/A | 0  | 0.000 | G/A | 6  | 0.351 |
|                             | rs17182166 | G/T | 18 | 0.232 | G/T | 17 | 0.394 |
| AMH type 2 receptor (AMHR2) | rs784888   | C/G | 0  | 0.922 | C/G | 33 | 0.623 |
|                             | rs784892   | C/T | 0  | 0.962 | C/T | 27 | 0.715 |
|                             | rs784893   | T/C | 1  | 0.904 | T/C | 47 | 0.825 |
|                             | rs2002555  | T/C | 16 | 0.279 | T/C | 12 | 0.152 |
|                             | rs11170550 | G/T | 16 | 0.396 | G/T | 16 | 0.625 |
|                             | rs17695156 | C/T | 7  | 0.169 | C/T | 1  | 0.000 |
|                             | rs36120387 | C/T | 10 | 0.254 | C/T | 2  | 0.768 |

\*Minor allele frequency (MAF) was calculated among controls in this study.
